# Supplementary material
Source: PubMed Central journal article supplement (PMC5161633)
Supplement: NIHMS823654-supplement-Supp_AppendixS1.pdf [file NIHMS823654-supplement-Supp_AppendixS1.pdf]

**Appendix 1: Overview of the genetic summary statistics available in the current version of `skeleSim`.** Analyses are nested within the categories 'Locus', 'Global', and 'Pairwise'. `skeleSim` accesses functions within existing R packages (see footnotes for packages used and corresponding object type).

| Analysis Type | Locus Type* | SkeleSim notation | Description                            | Object and Ref      | R function: what it looks like in R                      | Function explanation given by R package                                                   |
|---------------|-------------|-------------------|----------------------------------------|---------------------|----------------------------------------------------------|-------------------------------------------------------------------------------------------|
| Global        | MS/ Seq     | Chi2              | $\chi^2$ test statistic for pop struct | gtypes <sup>1</sup> | <code>overallTest(g, stats="chi2", nrep=100)</code>      | Population structure statistic                                                            |
| Global        | MS/ Seq     | Chi2.pval         | $p$ -value for $\chi^2$                | gtypes <sup>1</sup> | derived from function above (nrep)                       | $p$ -value for population structure statistic                                             |
| Global        | MS/ Seq     | Fst               | $F_{ST}$ , F-statistic                 | gtypes <sup>1</sup> | <code>overallTest(g, stats="fst", nrep=100)</code>       | Population structure statistic                                                            |
| Global        | MS/ Seq     | Fst.pval          | $p$ -value for $F_{ST}$                | gtypes <sup>1</sup> | derived from function above (nrep)                       | $p$ -value for population structure statistic                                             |
| Global        | MS/ Seq     | F'st              | $F'_{ST}$                              | gtypes <sup>1</sup> | <code>overallTest(g, stats="fst.prime", nrep=100)</code> | Population structure statistic                                                            |
| Global        | MS/ Seq     | F'st.pval         | $p$ -value for $F'_{ST}$               | gtypes <sup>1</sup> | derived from function above (nrep)                       | $p$ -value for population structure statistic                                             |
| Global        | MS          | Fis               | $F_{IS}$                               | gtypes <sup>1</sup> | <code>overallTest(g, stats="fis", nrep=100)</code>       | Population structure statistic                                                            |
| Global        | MS          | Fis.pval          | $p$ -value for $F_{IS}$                | gtypes <sup>1</sup> | derived from function above (nrep)                       | $p$ -value for population structure statistic                                             |
| Global        | MS          | Gst               | $G_{ST}$                               | gtypes <sup>1</sup> | <code>overallTest(g, stats="gst", nrep=100)</code>       | Population structure statistic                                                            |
| Global        | MS          | Gst.pval          | $p$ -value for $G_{ST}$                | gtypes <sup>1</sup> | derived from function above (nrep)                       | $p$ -value for population structure statistic                                             |
| Global        | MS          | G'st              | $G'_{ST}$                              | gtypes <sup>1</sup> | <code>overallTest(g, stats="gst.prime", nrep=100)</code> | Population structure statistics. Type of $G'_{ST}$ to calculate can be "nei" or "hedrick" |
| Global        | MS          | G'st.pval         | $p$ -value for, $G'_{ST}$              | gtypes <sup>1</sup> | derived from function above (nrep)                       | $p$ -value for population structure statistic                                             |
| Global        | MS          | G''st             | $G''_{ST}$                             | gtypes <sup>1</sup> | <code>overallTest(g, stats="gst.dbl.prime",</code>       | Population structure statistic                                                            |

|        |     |                      |                                   |                     |                                         |                                                                                                                                                             |
|--------|-----|----------------------|-----------------------------------|---------------------|-----------------------------------------|-------------------------------------------------------------------------------------------------------------------------------------------------------------|
|        |     |                      |                                   |                     | nrep=100)                               |                                                                                                                                                             |
| Global | MS  | G''st.pval           | $p$ -value for $G''_{ST}$         | gtypes <sup>1</sup> | derived from function above (nrep)      | $p$ -value for population structure statistic                                                                                                               |
| Global | Seq | Phist                | $\Phi$ -statistic                 | gtypes <sup>1</sup> | overallTest(g, stats="phist", nrep=100) | Population structure statistic                                                                                                                              |
| Global | Seq | Phist.p.val          | $p$ -value for $\Phi$             | gtypes <sup>1</sup> | derived from function above (nrep)      | $p$ -value for population structure statistic                                                                                                               |
| Locus  | MS  | allelic.richness     | Allelic richness                  | gtypes <sup>1</sup> | allelicRichness(g)                      | The allelic richness of each locus calculated as num. alleles divided by num. of samples without missing data at that locus                                 |
| Locus  | MS  | num.alleles          | Number of alleles                 | gtypes <sup>1</sup> | numAlleles(g)                           | Return the number of alleles for each locus                                                                                                                 |
| Locus  | MS  | prop.genotyped       | Proportion genotyped              | gtypes <sup>1</sup> | prop.genotyped(g)                       | Delivers standard by-locus summaries, including proportion of samples genotyped                                                                             |
| Locus  | MS  | theta                | $\theta$ , theta                  | gtypes <sup>1</sup> | theta(g)                                | Calculate $\theta$ from heterozygosity of each locus                                                                                                        |
| Locus  | MS  | exptd.heterozygosity | Expected heterozygosity           | gtypes <sup>1</sup> | exptdHet(g)                             | Expected heterozygosity for diploid data                                                                                                                    |
| Locus  | MS  | obsvd.heterozygosity | Observed heterozygosity           | gtypes <sup>1</sup> | obsvdHet(g)                             | Observed heterozygosity for diploid data                                                                                                                    |
| Locus  | MS  | Fis                  | $F_{IS}$ , Inbreeding coefficient | loci <sup>2</sup>   | Fst(loci)                               | A matrix with loci as rows and three F-statistics as columns. Formulae are used per-allele, then averaged within each locus over the alleles <sup>4</sup> . |
| Locus  | MS  | Fit                  | $F_{IT}$ , Overall fixation index | loci <sup>2</sup>   | Fst(loci)                               | A matrix with loci as rows and three F-statistics as columns. Formulae are used per-allele, then averaged within each locus over the alleles <sup>4</sup> . |
| Locus  | MS  | Fst                  | $F_{ST}$ , Fixation index         | loci <sup>2</sup>   | Fst(loci)                               | A matrix with loci as rows and three F-statistics as columns. Formulae are used per-allele, then averaged within each locus over the alleles <sup>4</sup> . |

|       |     |                       |                                        |                     |                                                                          |                                                                                                                               |
|-------|-----|-----------------------|----------------------------------------|---------------------|--------------------------------------------------------------------------|-------------------------------------------------------------------------------------------------------------------------------|
| Locus | MS  | hwe.p                 | Hardy-Weinberg equilibrium             | gtypes <sup>1</sup> | hweTest(g,<br>use.genepop=FALSE,<br>B=1000,<br>label="HWE.genepop", ...) | Calculate Hardy-Weinberg equilibrium $p$ -values.                                                                             |
| Locus | MS  | num.priv.allele       | Number of private alleles              | gtypes <sup>1</sup> | privateAlleles(g)                                                        | The num. private alleles in each strata and locus                                                                             |
| Locus | MS  | prop.unique.alleles   | Proportion of unique alleles           | gtypes <sup>1</sup> | propUniqueAlleles(g)                                                     | Proportion of unique (occurring in one individual) alleles for each locus                                                     |
| Locus | MS  | mRatio                | $M$ -ratio, bottleneck statistic       | gtypes <sup>1</sup> | mRatio(g)                                                                | Calculate $M$ -ratio (bottleneck) statistic for microsatellite data <sup>5</sup>                                              |
| Locus | Seq | hap.richness          | Haplotype richness                     | gtypes <sup>1</sup> | allelicRichness(g)                                                       | The haplotype richness of each locus calculated as num. haplotypes divided by num. samples without missing data at that locus |
| Locus | Seq | num.haps              | Number of haplotypes                   | gtypes <sup>1</sup> | numAlleles(g)                                                            | Return the number of haplotypes for each locus                                                                                |
| Locus | Seq | nucleotide.diversity  | $\pi$ , nucleotide diversity           | gtypes <sup>1</sup> | nucleotideDiversity(g)                                                   | Calculate nucleotide diversity for set of haplotypes (nucleotide diversity by site).                                          |
| Locus | Seq | nucleotide.divergence | dA, mean nucleotide divergence within  | gtypes <sup>1</sup> | dA <-<br>nucleotideDivergence(g);<br>dA[[1]]\$within                     | Calculate Nei's dA between strata, and distributions of within-strata nucleotide divergence (seq. distance) <sup>6</sup> .    |
| Locus | Seq | Heterozygosity        | Heterozygosity/<br>haplotype diversity | gtypes <sup>1</sup> | exptdHet(g)                                                              | A measure of haplotypic diversity (haploid "heterozygosity")                                                                  |
| Locus | Seq | num.private.haps      | Number of private haplotypes           | gtypes <sup>1</sup> | privateAlleles(g)                                                        | The number of private haplotypes in each strata and locus.                                                                    |
| Locus | Seq | pct.unique.haps       | Percent unique haplotypes              | gtypes <sup>1</sup> | propUniqueAlleles(g)                                                     | The proportion of unique haplotypes (occurring only in one individual).                                                       |
| Locus | Seq | Fu.F                  | Fu's $F_S$                             | gtypes <sup>1</sup> | FusFs(g)                                                                 | Calculate Fu's $F_S$ for a set of sequences to test for selection <sup>7</sup> .                                              |
| Locus | Seq | Fu.F.p.val            | $p$ -value for Fu's $F_S$              | gtypes <sup>1</sup> | derived from function above                                              | $p$ -value for Fu's $F_S$                                                                                                     |
| Locus | Seq | Taj.D                 | Tajima's $D$ statistic                 | gtypes <sup>1</sup> | tajimasD(g)                                                              | Calculate Tajima's $D$ for a set of sequences to test for selection <sup>8</sup> .                                            |

| Locus    | Seq     | Taj.D.p.val | $p$ -value for Tajima's $D$                                          | gtypes <sup>1</sup> | derived from function above                        | $p$ -value for Tajima's $D$                             |
|----------|---------|-------------|----------------------------------------------------------------------|---------------------|----------------------------------------------------|---------------------------------------------------------|
| Pairwise | MS/ Seq | Chi2        | $\chi^2$ test statistic for pairwise population differentiation      | gtypes <sup>1</sup> | pairwiseTest(g, nrep=1000, stats="chi2", ...)      | Pairwise test of genetic differentiation                |
| Pairwise | MS/ Seq | Chi2.p.val  | $p$ -value for $\chi^2$ test for pairwise population differentiation | gtypes <sup>1</sup> | derived from function above                        | $p$ -value for pairwise test of genetic differentiation |
| Pairwise | MS/ Seq | Fst         | pairwise $F_{ST}$                                                    | gtypes <sup>1</sup> | pairwiseTest(g, nrep=1000, stats="fst", ...)       | Pairwise test of genetic differentiation                |
| Pairwise | MS/ Seq | Fst.p.val   | $p$ -value for pairwise $F_{ST}$                                     | gtypes <sup>1</sup> | derived from function above                        | $p$ -value for pairwise test of genetic differentiation |
| Pairwise | MS      | F'st        | pairwise $F'_{ST}$                                                   | gtypes <sup>1</sup> | pairwiseTest(g, nrep=1000, stats="fst.prime", ...) | Pairwise test of genetic differentiation                |
| Pairwise | MS      | F'st.p.val  | $p$ -value for pairwise $F'_{ST}$                                    | gtypes <sup>1</sup> | derived from function above                        | $p$ -value for pairwise test of genetic differentiation |
| Pairwise | MS      | Fis         | pairwise $F_{IS}$                                                    | gtypes <sup>1</sup> | pairwiseTest(g, nrep=1000, stats="fis", ...)       | Pairwise test of genetic differentiation                |
| Pairwise | MS      | Fis.p.val   | $p$ -value for pairwise $F_{IS}$                                     | gtypes <sup>1</sup> | derived from function above                        | $p$ -value for pairwise test of genetic differentiation |
| Pairwise | MS      | Gst         | pairwise $G_{ST}$                                                    | gtypes <sup>1</sup> | pairwiseTest(g, nrep=1000, stats="gst", ...)       | Pairwise test of genetic differentiation                |
| Pairwise | MS      | Gst.p.val   | $p$ -value for pairwise $G_{ST}$                                     | gtypes <sup>1</sup> | derived from function above                        | $p$ -value for pairwise test of genetic differentiation |
| Pairwise | MS      | G'st        | pairwise $G'_{ST}$                                                   | gtypes <sup>1</sup> | pairwiseTest(g, nrep=1000, stats="gst.prime", ...) | Pairwise test of genetic differentiation                |
| Pairwise | MS      | G'st.p.val  | $p$ -value for pairwise $G'_{ST}$                                    | gtypes <sup>1</sup> | derived from function above                        | $p$ -value for pairwise test of genetic differentiation |
| Pairwise | MS      | G''st       | pairwise $G''_{ST}$                                                  | gtypes <sup>1</sup> | pairwiseTest(g,                                    | Pairwise test of genetic differentiation                |

|          |         |                       |                                        |                     |                                                       |                                                                                                                                                                |
|----------|---------|-----------------------|----------------------------------------|---------------------|-------------------------------------------------------|----------------------------------------------------------------------------------------------------------------------------------------------------------------|
|          |         |                       |                                        |                     | nrep=1000,<br>stats="gst.dbl.prime",<br>...)          |                                                                                                                                                                |
|          | MS      | G''st.p.val           | $p$ -value for pairwise $G''_{ST}$     | gtypes <sup>1</sup> | derived from function above                           | $p$ -value for pairwise test of genetic differentiation                                                                                                        |
| Pairwise | MS/ Seq | chord.dist            | Chord distance                         | dat <sup>3</sup>    | genet.dist(dat,<br>diploid=TRUE,<br>method="Dch")     | Chord distance (eqn #6 in <sup>9</sup> ) is returned. This distance is used as default since it is best to retrieve the relation among samples <sup>10</sup> . |
| Pairwise | MS/ Seq | shared.alleles        | Number of shared alleles or haplotypes | gtypes <sup>1</sup> | sharedAlleles(g)                                      | The number alleles shared among populations                                                                                                                    |
| Pairwise | Seq     | nucleotide.divergence | Mean nucleotide divergence between     | gtypes <sup>1</sup> | dA <-<br>nucleotideDivergence(g);<br>dA[[1]]\$between | Calculate Nei's dA between strata, and distributions of between-strata nucleotide divergence (seq distance) <sup>6</sup> .                                     |
| Pairwise | Seq     | Phist                 | $\Phi$ -statistic                      | gtypes <sup>1</sup> | pairwiseTest(g,<br>nrep=1000, stats="phist",<br>...)  | Pairwise test of genetic differentiation                                                                                                                       |
| Pairwise | Seq     | Phist.p.val           | $p$ -value for $\Phi$                  | gtypes <sup>1</sup> | derived from function above                           | $p$ -value for pairwise test of genetic differentiation                                                                                                        |

\*Locus type is either microsatellite (MS), sequence (Seq), or both (MS/Seq).

<sup>1</sup>g, a gtypes object; Archer FI, Adams PE, Schneiders B. strataG: An R package for manipulating, summarizing, and analyzing population genetic data. *In submission, Molecular Ecology Resources*.

<sup>2</sup>a loci object; Paradis E (2010) pegas: an R package for population genetics with an integrated-modular approach. *Bioinformatics* 26: 419-420.

<sup>3</sup>dat, a data.frame; Goudet J (2005) hierfstat, a package for R to compute and test hierarchical F-statistics. *Molecular Ecology Notes* 5: 184-186.

<sup>4</sup>Weir BS, Cockerham CC (1984) Estimating F-statistics for the analysis of population structure. *Evolution* 38: 1358-1370.

<sup>5</sup>Garza JC, Williamson EG (2001) Detection of reduction in population size using data from microsatellite loci. *Molecular Ecology* 10: 305-318.

<sup>6</sup>Nei M, Kumar S (2000) *Molecular Evolution and Phylogenetics*. Oxford University Press, Oxford. (dA: pp. 256, eqn 12.67)

<sup>7</sup>Fu Y-X (1997) Statistical tests of neutrality of mutations against population growth, hitchhiking and background selection. *Genetics* 147:915-925.

<sup>8</sup>Tajima F (1989) Statistical method for testing the neutral mutation hypothesis by DNA polymorphism. *Genetics* 123:585-595.

<sup>9</sup>Cavalli-Sforza LL, Edwards AW (1967) Phylogenetic analysis. Models and estimation procedures. *American Journal of Human Genetics* 19 (3 Pt 1): 233.

<sup>10</sup>Takezaki N, Nei M (1996) Genetic distances and reconstruction of Phylogenetic trees from microsatellite DNA. *Genetics* 144:389-399.
